# Supplementary material for: The VEGA Tool to Check the Applicability Domain Gives Greater Confidence in the Prediction of In Silico Models
Source: MDPI journal article supplement (doi:10.3390/ijms24129894), 2023-06-08
Supplement: s1 [file s1]

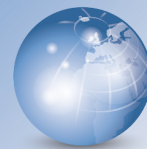

# Report

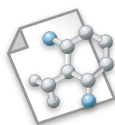

Prediction and Applicability Domain analysis for models:

Liver NOAEL (CORAL) 1.0.1

Core version: 1.3.14

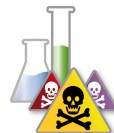

## 1. Prediction Summary

Prediction for compound Molecule 0 -

|                                                                                                                                                                                                                                                                                                                                                                                    |                                                                                                                                                                                                                                                                                                                                                                               |
|------------------------------------------------------------------------------------------------------------------------------------------------------------------------------------------------------------------------------------------------------------------------------------------------------------------------------------------------------------------------------------|-------------------------------------------------------------------------------------------------------------------------------------------------------------------------------------------------------------------------------------------------------------------------------------------------------------------------------------------------------------------------------|
| 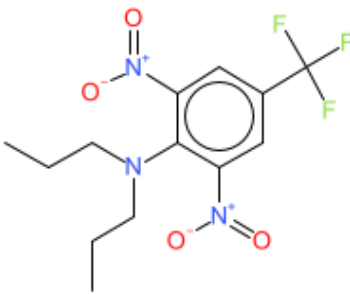 <p>The chemical structure of Molecule 0 is a benzene ring substituted with two nitro groups (NO<sub>2</sub>) at the 1 and 3 positions, a diethylamino group (N(CH<sub>2</sub>CH<sub>3</sub>)<sub>2</sub>) at the 4 position, and a trifluoromethyl group (CF<sub>3</sub>) at the 5 position.</p> | <p>Prediction:  Reliability: </p> <p><b>Prediction is 2.3449, the result appears reliable. Anyhow, you should check it through the evaluation of the information given in the following sections.</b></p> |
|------------------------------------------------------------------------------------------------------------------------------------------------------------------------------------------------------------------------------------------------------------------------------------------------------------------------------------------------------------------------------------|-------------------------------------------------------------------------------------------------------------------------------------------------------------------------------------------------------------------------------------------------------------------------------------------------------------------------------------------------------------------------------|

Compound: Molecule 0

Compound SMILES: O=[N+](O-)[c1cc(cc(c1N(CCC)CCC)[N+](=O)[O-])C(F)(F)F

Experimental value: -

Liver NOAEL [log(mg/kg bw)]: 2.3449

Reliability: The predicted compound is into the Applicability Domain of the model

Remarks:

none

### 3.1 Applicability Domain:

#### Similar Compounds, with Predicted and Experimental Values

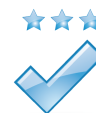

|                                                                                     |                                                                                                                                                                                                                                                        |
|-------------------------------------------------------------------------------------|--------------------------------------------------------------------------------------------------------------------------------------------------------------------------------------------------------------------------------------------------------|
| 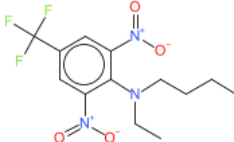   | <p>Compound #1</p> <p>CAS: N.A.<br/>Dataset id:173 (Training Set)<br/>SMILES: <chem>O=[N+](O-)[c1cc(cc(c1N(CC)CCCC)[N+](=O)[O-])C(F)(F)F</chem><br/>Similarity: 0.99<br/>Experimental value : 2.718<br/>Predicted value : 2.253</p>                    |
|    | <p>Compound #2</p> <p>CAS: N.A.<br/>Dataset id:56 (Training Set)<br/>SMILES: <chem>O=[N+](O-)[c1cc(cc(c1N(CCC)CCCl)[N+](=O)[O-])C(F)(F)F</chem><br/>Similarity: 0.961<br/>Experimental value : 1.778<br/>Predicted value : 2.285</p>                   |
|   | <p>Compound #3</p> <p>CAS: N.A.<br/>Dataset id:129 (Training Set)<br/>SMILES: <chem>O=[N+](O-)[c1cc(cc(c1(NC(C)CC)))[N+](=O)[O-])C(C)(C)C</chem><br/>Similarity: 0.895<br/>Experimental value : 1<br/>Predicted value : 2.256</p>                      |
|  | <p>Compound #4</p> <p>CAS: N.A.<br/>Dataset id:107 (Training Set)<br/>SMILES: <chem>O=[N+](O-)[c1cc(c(c(c1(NC(CC)CC)))[N+](=O)[O-])C)C</chem><br/>Similarity: 0.891<br/>Experimental value : 1.593<br/>Predicted value : 2.265</p>                     |
|  | <p>Compound #5</p> <p>CAS: N.A.<br/>Dataset id:160 (Training Set)<br/>SMILES: <chem>O=[N+](O-)[c2cc(c(c(c2(Nc1ncc(cc1Cl)C(F)(F)F)))[N+](=O)[O-])Cl)C(F)(F)F</chem><br/>Similarity: 0.766<br/>Experimental value : 0.58<br/>Predicted value : 1.994</p> |
|  | <p>Compound #6</p> <p>CAS: N.A.<br/>Dataset id:139 (Training Set)<br/>SMILES: <chem>O=C(Nc1cccc(OC(C)C)c1)c2ccccc2C(F)(F)F</chem><br/>Similarity: 0.764<br/>Experimental value : 1.643<br/>Predicted value : 2.077</p>                                 |

## 3.2 Applicability Domain: Measured Applicability Domain Scores

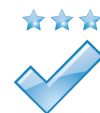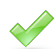

Global AD Index

AD index = 1

Explanation: The predicted compound is into the Applicability Domain of the model.

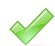

Similar molecules with known experimental value

Similarity index = 0.975

Explanation: Strongly similar compounds with known experimental value in the training set have been ..

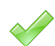

Accuracy of prediction for similar molecules

Accuracy index = 0.486

Explanation: Accuracy of prediction for similar molecules found in the training set is good..

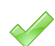

Concordance for similar molecules

Concordance index = 0.47

Explanation: Similar molecules found in the training set have experimental values that agree with the predicted value..

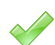

Maximum error of prediction among similar molecules

Max error index = 0.507

Explanation: the maximum error in prediction of similar molecules found in the training set has a low value, considering the experimental variability..



Model's descriptors range check

Descriptors range check = True

Explanation: descriptors for this compound have values inside the descriptor range of the compounds of the training set..



Atom Centered Fragments similarity check

ACF index = 1

Explanation: all atom centered fragment of the compound have been found in the compounds of the training set..

Symbols explanation:



The feature has a good assessment, model is reliable regarding this aspect.

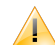

The feature has a non optimal assessment, this aspect should be reviewed by an expert.

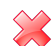

The feature has a bad assessment, model is not reliable regarding this aspect.
