# Supplementary material for: The VEGA Tool to Check the Applicability Domain Gives Greater Confidence in the Prediction of In Silico Models
Source: MDPI journal article supplement (doi:10.3390/ijms24129894), 2023-06-08
Supplement: s1 [file s1]

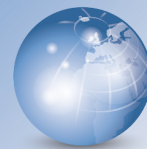

# Report

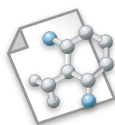

Prediction and Applicability Domain analysis for models:

Henry's Law model (OPERA) 1.0.1

Core version: 1.3.14

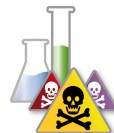

## 1. Prediction Summary

Prediction for compound Molecule 0 -

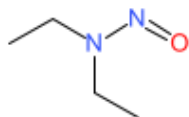

Prediction:

Reliability:

Prediction is -4.9375 log atm-m<sup>3</sup>/mole, but the result may be not reliable. A check of the information given in the following section should be done, paying particular attention to the following issues:

- similar molecules found in the training set have experimental values that disagree with the predicted value
- the maximum error in prediction of similar molecules found in the training set has a moderate value, considering the experimental variability
- a prominent number of atom centered fragments of the compound have not been found in the compounds of the training set or are rare fragments (2 unknown fragments found)

Compound: Molecule 0

Compound SMILES: O=NN(CC)CC

Experimental value: -

Predicted Henry's law [log atm-m<sup>3</sup>/mole]: -4.9375

Reliability: The predicted compound is outside the Applicability Domain of the model

Remarks:

none

### 3.1 Applicability Domain:

#### Similar Compounds, with Predicted and Experimental Values

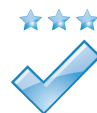

|                                                                                     |                                                                                                                                                                                                           |
|-------------------------------------------------------------------------------------|-----------------------------------------------------------------------------------------------------------------------------------------------------------------------------------------------------------|
| 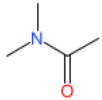   | <p>Compound #1</p> <p>CAS: 127-19-5<br/>Dataset id:239 (Training Set)<br/>SMILES: <chem>O=C(N(C)C)C</chem><br/>Similarity: 0.803<br/>Experimental value : -7.883<br/>Predicted value : -7.118</p>         |
|    | <p>Compound #2</p> <p>CAS: 109-89-7<br/>Dataset id:188 (Training Set)<br/>SMILES: <chem>N(CC)CC</chem><br/>Similarity: 0.761<br/>Experimental value : -4.593<br/>Predicted value : -5.048</p>             |
|   | <p>Compound #3</p> <p>CAS: 543-29-3<br/>Dataset id:287 (Training Set)<br/>SMILES: <chem>O=[N+](OCC(C)C)[O-]</chem><br/>Similarity: 0.76<br/>Experimental value : -2.648<br/>Predicted value : -2.786</p>  |
|  | <p>Compound #4</p> <p>CAS: 1712-64-7<br/>Dataset id:334 (Training Set)<br/>SMILES: <chem>O=[N+](OC(C)C)[O-]</chem><br/>Similarity: 0.755<br/>Experimental value : -2.793<br/>Predicted value : -2.785</p> |
|  | <p>Compound #5</p> <p>CAS: 121-44-8<br/>Dataset id:220 (Training Set)<br/>SMILES: <chem>N(CC)(CC)CC</chem><br/>Similarity: 0.754<br/>Experimental value : -3.827<br/>Predicted value : -3.979</p>         |
|  | <p>Compound #6</p> <p>CAS: 108-03-2<br/>Dataset id:157 (Training Set)<br/>SMILES: <chem>O=[N+](CCC)[O-]</chem><br/>Similarity: 0.75<br/>Experimental value : -4.06<br/>Predicted value : -4.576</p>       |

## 3.2 Applicability Domain: Measured Applicability Domain Scores

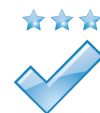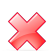

Global AD Index

AD index = 0.309

Explanation: The predicted compound is outside the Applicability Domain of the model.

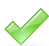

Similar molecules with known experimental value

Similarity index = 0.773

Explanation: Strongly similar compounds with known experimental value in the training set have been ..

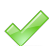

Accuracy of prediction for similar molecules

Accuracy index = 0.452

Explanation: Accuracy of prediction for similar molecules found in the training set is good..

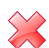

Concordance for similar molecules

Concordance index = 1.86

Explanation: similar molecules found in the training set have experimental values that disagree with the predicted value..

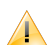

Maximum error of prediction among similar molecules

Max error index = 0.765

Explanation: the maximum error in prediction of similar molecules found in the training set has a moderate value, considering the experimental variability..

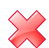

Atom Centered Fragments similarity check

ACF index = 0.4

Explanation: a prominent number of atom centered fragments of the compound have not been found in the compounds of the training set or are rare fragments (2 unknown fragments found)..

Symbols explanation:

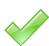

The feature has a good assessment, model is reliable regarding this aspect.

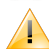

The feature has a non optimal assessment, this aspect should be reviewed by an expert.

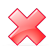

The feature has a bad assessment, model is not reliable regarding this aspect.

## 4.1 Reasoning: Relevant Chemical Fragments and Moieties

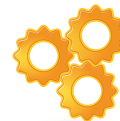

(Molecule 0) Reasoning on rare and missing Atom Centered Fragments .

The following Atom Centered Fragments have been found in the molecule, but they are not found or rarely found in the model's training set:

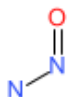

Fragment defined by the SMILES: NN=O  
The fragment has never been found in the model's training set

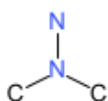

Fragment defined by the SMILES: CN(C)N  
The fragment has never been found in the model's training set
