# Supplementary material for: The VEGA Tool to Check the Applicability Domain Gives Greater Confidence in the Prediction of In Silico Models
Source: Int J Mol Sci. 2023 Jun 8;24(12):9894. doi: 10.3390/ijms24129894 (PMC10298077; doi:10.3390/ijms24129894)
Supplement: Supplementary file 1 [file ijms-24-09894-s001.zip › Supplementary_Material.xlsx]

## Sheet: Table S1 Statistics of regressi
Model	AD_info	RMSE	MAE	R2	CCC	n
BCF KNN EXT	In AD	0.687	0.523	0.76	0.87	106
	Possible out AD	0.938	0.718	0.437	0.682	153
	Out AD	0.921	0.743	0.614	0.778	273
BCF Arnot-Gobas EXT	In AD	0.564	0.379	0.798	0.89	37
	Possible out AD	0.61	0.481	0.756	0.873	90
	Out AD	1.081	0.839	0.296	0.662	387
Water solubility	In AD	0.651	0.437	0.92	0.958	268
Water solubility	Possible out AD	0.826	0.614	0.848	0.916	360
Water solubility	Out AD	1.246	0.95	0.674	0.806	303
Persistence Water reg	In AD	0.172	0.087	0.959	0.979	29
Persistence Water reg	Possible out AD	0.626	0.533	0.517	0.693	7
Persistence Water reg	Out AD	0.407	0.276	0.529	0.712	9
Persistence Sediment reg	In AD	0.237	0.18	0.887	0.94	24
Persistence Sediment reg	Possible out AD	0.38	0.298	0.497	0.846	6
Persistence Sediment reg	Out AD	0.396	0.297	0.533	0.792	14
Daphnia NOEC IRFMN	In AD	0.459	0.385	0.765	0.858	23
Daphnia NOEC IRFMN	Possible out AD	0.742	0.586	0.627	0.735	29
Daphnia NOEC IRFMN	Out AD	0.997	0.785	0.43	0.602	40
Fish LC50 IRFMN	In AD	0.487	0.402	0.81	0.884	24
Fish LC50 IRFMN	Possible out AD	1.016	0.739	0.515	0.66	18
Fish LC50 IRFMN	Out AD	1.216	1.024	0.324	0.51	25
Fish LC50 Combase	In AD	#N/A	#N/A	#N/A	#N/A	0
Fish LC50 Combase	Possible out AD	0.563	0.496	0.569	0.909	2
Fish LC50 Combase	Out AD	0.737	0.596	0.731	0.883	20
Fathead LC50 EPA	In AD	0.677	0.464	0.465	0.708	30
Fathead LC50 EPA	Possible out AD	0.687	0.543	0.688	0.819	75
Fathead LC50 EPA	Out AD	1.177	0.946	0.591	0.771	58
Daphnia EC50 IRFMN	In AD	0.6	0.486	0.655	0.773	44
Daphnia EC50 IRFMN	Possible out AD	0.664	0.497	0.513	0.724	51
Daphnia EC50 IRFMN	Out AD	0.853	0.656	0.572	0.749	38
Carcinogenicity SFO reg	In AD	0.517	0.361	0.941	0.968	17
Carcinogenicity SFO reg	Possible out AD	0.926	0.77	0.696	0.812	29
Carcinogenicity SFO reg	Out AD	1.559	1.33	-0.116	0.273	43
Carcinogenicity SFI reg	In AD	0.906	0.711	0.797	0.877	4
Carcinogenicity SFI reg	Possible out AD	1.112	0.889	-0.226	0.45	9
Carcinogenicity SFI reg	Out AD	1.181	1.006	0.569	0.724	14
BCF CAESAR	In AD	0.519	0.375	0.848	0.927	31
BCF CAESAR	Possible out AD	0.605	0.478	0.75	0.875	34
BCF CAESAR	Out AD	0.715	0.537	0.674	0.788	30
Algae EC50 IRFMN	In AD	0.527	0.42	0.828	0.911	17
Algae EC50 IRFMN	Possible out AD	1.285	0.919	0.642	0.724	17
Algae EC50 IRFMN	Out AD	1.689	1.38	0.343	0.57	29
Algae EC50 Combase	In AD	0.596	0.478	0.565	0.777	20
Algae EC50 Combase	Possible out AD	0.732	0.611	0.569	0.747	43
Algae EC50 Combase	Out AD	0.559	0.434	0.829	0.912	46
Adipose tissue blood INERIS	In AD	0.169	0.145	0.981	0.989	12
Adipose tissue blood INERIS	Possible out AD	0.372	0.271	0.847	0.905	8
Adipose tissue blood INERIS	Out AD	0.682	0.523	0.474	0.652	18
Air HL CORAL	In AD	0.294	0.229	0.885	0.942	34
Air HL CORAL	Possible out AD	0.603	0.505	0.624	0.838	23
Air HL CORAL	Out AD	0.784	0.622	-0.311	0.501	18
Algae NOEC IRFMN	In AD	0.738	0.571	0.592	0.773	13
Algae NOEC IRFMN	Possible out AD	1.348	1.125	0.677	0.774	31
Algae NOEC IRFMN	Out AD	2.292	1.794	0.377	0.547	38
Liver LOAEL	In AD	0.374	0.356	-0.062	0.08	4
Liver LOAEL	Possible out AD	0.456	0.381	0.394	0.633	56
Liver LOAEL	Out AD	0.397	0.302	0.74	0.836	96
Liver NOAEL	In AD	0.258	0.224	0.346	0.675	4
Liver NOAEL	Possible out AD	0.766	0.591	-0.033	0.041	32
Liver NOAEL	Out AD	0.934	0.719	-0.381	0.037	119
Henry's Law OPERA	In AD	0.088	0.069	0.996	0.998	59
Henry's Law OPERA	Possible out AD	0.158	0.13	0.992	0.996	33
Henry's Law OPERA	Out AD	0.197	0.15	0.994	0.997	58
Daphnia LC50 EPA	In AD	0.508	0.374	0.798	0.885	12
Daphnia LC50 EPA	Possible out AD	0.914	0.737	0.549	0.711	27
Daphnia LC50 EPA	Out AD	1.53	1.253	0.364	0.643	29
Zebrafish embryo AC50	In AD	0.463	0.456	0.16	0.694	5
Zebrafish embryo AC50	Possible out AD	0.43	0.354	0.618	0.804	8
Zebrafish embryo AC50	Out AD	0.198	0.182	0.844	0.92	7
NOAEL	In AD	0.438	0.385	0.192	0.435	8
NOAEL	Possible out AD	0.361	0.283	0.528	0.739	17
NOAEL	Out AD	0.509	0.431	0.519	0.775	18
Daphnia EC50 Combase	In AD	#N/A	#N/A	#N/A	#N/A	0
Daphnia EC50 Combase	Possible out AD	1.401	1.362	0.423	0.794	4
Daphnia EC50 Combase	Out AD	1.032	0.824	0.625	0.827	30
BCF Meylan	In AD	0.46	0.393	0.895	0.942	29
BCF Meylan	Possible out AD	0.533	0.424	0.767	0.877	53
BCF Meylan	Out AD	0.793	0.602	0.76	0.861	64
kM HL EpiSuite	In AD	0.357	0.287	0.899	0.95	70
kM HL EpiSuite	Possible out AD	0.617	0.477	0.678	0.846	97
kM HL EpiSuite	Out AD	1.081	0.89	-0.054	0.546	37

## Sheet: Table S2 Statistics of binary c
Model	AD_info	Sensitivity	Specificity	Pos Pred Value	Neg Pred Value	Precision	Recall	F1	Prevalence	Detection Rate	Detection Prevalence	Balanced Accuracy	Accuracy	Gmean	n
Dev-Repr Toxicity CORAL EXT	In AD	1	0	0.804		0.804	1	0.891	0.804	0.804	1	0.5	0.804	0	51
	Possible out AD	0.92	0.455	0.793	0.714	0.793	0.92	0.852	0.694	0.639	0.806	0.687	0.778	0.647	36
	Out AD	0.368	0.945	0.824	0.684	0.824	0.368	0.509	0.409	0.151	0.183	0.657	0.71	0.59	93
Ready Biodegradability	In AD	1	0.947	0.967	1	0.967	1	0.983	0.604	0.604	0.625	0.974	0.979	0.973	48
Ready Biodegradability	Possible out AD	0.818	0.741	0.72	0.833	0.72	0.818	0.766	0.449	0.367	0.51	0.779	0.776	0.778	49
Ready Biodegradability	Out AD	0.25	0.632	0.125	0.8	0.125	0.25	0.167	0.174	0.043	0.348	0.441	0.565	0.397	23
Sludge Classification Combase	In AD	1	0.667	0.75	1	0.75	1	0.857	0.5	0.5	0.667	0.833	0.833	0.816	6
Sludge Classification Combase	Possible out AD	1	0.667	0.5	1	0.5	1	0.667	0.25	0.25	0.5	0.833	0.75	0.816	8
Sludge Classification Combase	Out AD	0.714	0.846	0.714	0.846	0.714	0.714	0.714	0.35	0.25	0.35	0.78	0.8	0.777	20
Algae Classification Combase	In AD	0.955	0.8	0.875	0.923	0.875	0.955	0.913	0.595	0.568	0.649	0.877	0.892	0.874	37
Algae Classification Combase	Possible out AD	0.682	0.889	0.938	0.533	0.938	0.682	0.789	0.71	0.484	0.516	0.785	0.742	0.778	31
Algae Classification Combase	Out AD	0.818	0.722	0.783	0.765	0.783	0.818	0.8	0.55	0.45	0.575	0.77	0.775	0.769	40
In Vitro micronucleus	In AD	0.923	0.818	0.857	0.9	0.857	0.923	0.889	0.542	0.5	0.583	0.871	0.875	0.869	24
In Vitro micronucleus	Possible out AD	0.958	0.5	0.885	0.75	0.885	0.958	0.92	0.8	0.767	0.867	0.729	0.867	0.692	30
In Vitro micronucleus	Out AD	0.889	0.444	0.615	0.8	0.615	0.889	0.727	0.5	0.444	0.722	0.667	0.667	0.629	18
Skin sensitization NCSTOX	In AD	1	0.727	0.906	1	0.906	1	0.951	0.725	0.725	0.8	0.864	0.925	0.853	40
Skin sensitization NCSTOX	Possible out AD	1	0.429	0.667	1	0.667	1	0.8	0.533	0.533	0.8	0.714	0.733	0.655	15
Skin sensitization NCSTOX	Out AD	0.889	0.5	0.8	0.667	0.8	0.889	0.842	0.692	0.615	0.769	0.694	0.769	0.667	13
Carcinogenicity SFI class	In AD	0.871	0.878	0.844	0.9	0.844	0.871	0.857	0.431	0.375	0.444	0.875	0.875	0.875	72
Carcinogenicity SFI class	Possible out AD	0.636	0.783	0.583	0.818	0.583	0.636	0.609	0.324	0.206	0.353	0.709	0.735	0.706	34
Carcinogenicity SFI class	Out AD	0.364	0.676	0.267	0.767	0.267	0.364	0.308	0.244	0.089	0.333	0.52	0.6	0.496	45
Carcinogenicity SFO class	In AD	0.9	1	1	0.919	1	0.9	0.947	0.469	0.422	0.422	0.95	0.953	0.949	64
Carcinogenicity SFO class	Possible out AD	0.611	0.571	0.478	0.696	0.478	0.611	0.537	0.391	0.239	0.5	0.591	0.587	0.591	46
Carcinogenicity SFO class	Out AD	0.6	0.655	0.375	0.826	0.375	0.6	0.462	0.256	0.154	0.41	0.628	0.641	0.627	39
Skin sensitization JRC	In AD	0.95	0.889	0.95	0.889	0.95	0.95	0.95	0.69	0.655	0.69	0.919	0.931	0.919	29
Skin sensitization JRC	Possible out AD	0.455	1	1	0.455	1	0.455	0.625	0.688	0.312	0.312	0.727	0.625	0.674	16
Skin sensitization JRC	Out AD	0.4	0.625	0.667	0.357	0.667	0.4	0.5	0.652	0.261	0.391	0.512	0.478	0.5	23
Skin sensitization JRC EXT	In AD	0.853	0.412	0.89	0.333	0.89	0.853	0.871	0.848	0.723	0.812	0.632	0.786	0.593	112
Skin sensitization JRC EXT	Possible out AD	0.516	0.545	0.681	0.375	0.681	0.516	0.587	0.653	0.337	0.495	0.531	0.526	0.531	95
Skin sensitization JRC EXT	Out AD	0.58	0.264	0.543	0.295	0.543	0.58	0.561	0.601	0.349	0.642	0.422	0.454	0.392	218
Skin sensitization CAESAR	In AD	1	0.5	0.909	1	0.909	1	0.952	0.833	0.833	0.917	0.75	0.917	0.707	24
Skin sensitization CAESAR	Possible out AD	1	1	1	1	1	1	1	0.875	0.875	0.875	1	1	1	8
Skin sensitization CAESAR	Out AD	0.857	1	1	0.75	1	0.857	0.923	0.7	0.6	0.6	0.929	0.9	0.926	10
Skin sensitization CAESAR EXT	In AD	0.948	0.258	0.848	0.533	0.848	0.948	0.895	0.813	0.771	0.91	0.603	0.819	0.495	166
Skin sensitization CAESAR EXT	Possible out AD	0.925	0.19	0.742	0.5	0.742	0.925	0.824	0.716	0.662	0.892	0.558	0.716	0.42	74
Skin sensitization CAESAR EXT	Out AD	0.741	0.38	0.613	0.526	0.613	0.741	0.671	0.57	0.422	0.689	0.56	0.586	0.53	251
Mutagenicity SARpy	In AD	0.974	0.868	0.929	0.95	0.929	0.974	0.951	0.637	0.621	0.668	0.921	0.936	0.92	419
Mutagenicity SARpy	Possible out AD	0.817	0.83	0.817	0.83	0.817	0.817	0.817	0.482	0.393	0.482	0.823	0.824	0.823	272
Mutagenicity SARpy	Out AD	0.448	0.43	0.4	0.479	0.4	0.448	0.423	0.459	0.205	0.514	0.439	0.438	0.439	146
Mutagenicity SARpy EXT	In AD	0.856	0.856	0.722	0.932	0.722	0.856	0.784	0.304	0.26	0.36	0.856	0.856	0.856	3361
Mutagenicity SARpy EXT	Possible out AD	0.685	0.742	0.386	0.909	0.386	0.685	0.494	0.192	0.131	0.34	0.713	0.731	0.713	6109
Mutagenicity SARpy EXT	Out AD	0.537	0.527	0.212	0.827	0.212	0.537	0.304	0.192	0.103	0.486	0.532	0.529	0.532	5808
Mutagenicity CAESAR	In AD	0.955	0.843	0.917	0.912	0.917	0.955	0.935	0.644	0.615	0.671	0.899	0.915	0.897	447
Mutagenicity CAESAR	Possible out AD	0.813	0.752	0.746	0.817	0.746	0.813	0.778	0.473	0.385	0.515	0.782	0.781	0.782	260
Mutagenicity CAESAR	Out AD	0.519	0.553	0.452	0.618	0.452	0.519	0.483	0.415	0.215	0.477	0.536	0.538	0.535	130
Mutagenicity CAESAR EXT	In AD	0.887	0.814	0.686	0.94	0.686	0.887	0.773	0.314	0.279	0.406	0.85	0.837	0.849	3448
Mutagenicity CAESAR EXT	Possible out AD	0.725	0.737	0.397	0.918	0.397	0.725	0.513	0.193	0.14	0.352	0.731	0.734	0.731	5649
Mutagenicity CAESAR EXT	Out AD	0.691	0.558	0.259	0.89	0.259	0.691	0.377	0.183	0.127	0.488	0.625	0.582	0.621	6181
Mutagenicity ISS EXT	In AD	0.921	0.794	0.776	0.928	0.776	0.921	0.842	0.436	0.402	0.518	0.857	0.849	0.855	2376
Mutagenicity ISS EXT	Possible out AD	0.778	0.807	0.59	0.91	0.59	0.778	0.671	0.263	0.205	0.347	0.792	0.799	0.792	5152
Mutagenicity ISS EXT	Out AD	0.717	0.649	0.379	0.885	0.379	0.717	0.496	0.23	0.165	0.435	0.683	0.665	0.682	10271
Mutagenicity KNN EXT	In AD	0.624	0.844	0.426	0.924	0.426	0.624	0.506	0.156	0.098	0.229	0.734	0.81	0.726	2416
Mutagenicity KNN EXT	Possible out AD	0.529	0.691	0.214	0.902	0.214	0.529	0.305	0.137	0.073	0.34	0.61	0.668	0.604	7501
Mutagenicity KNN EXT	Out AD	0.492	0.636	0.189	0.879	0.189	0.492	0.274	0.147	0.073	0.383	0.564	0.614	0.559	2604
In Vivo micronucleus	In AD	1	1	1	1	1	1	1	0.222	0.222	0.222	1	1	1	9
In Vivo micronucleus	Possible out AD	1	1	1	1	1	1	1	0.75	0.75	0.75	1	1	1	8
In Vivo micronucleus	Out AD	0.5				1	0.5	0.667	1	0.5	0.5		0.5		2
Estrogen Receptor RBA	In AD	0.893	0.93	0.893	0.93	0.893	0.893	0.893	0.394	0.352	0.394	0.912	0.915	0.911	71
Estrogen Receptor RBA	Possible out AD	0.9	0.875	0.75	0.955	0.75	0.9	0.818	0.294	0.265	0.353	0.887	0.882	0.887	34
Estrogen Receptor RBA	Out AD	0.5	0.793	0.571	0.742	0.571	0.5	0.533	0.356	0.178	0.311	0.647	0.689	0.63	45
Hepatic Steatosis MIE PXR up	In AD	0.867	0.729	0.802	0.811	0.802	0.867	0.833	0.56	0.485	0.604	0.798	0.806	0.795	134
Hepatic Steatosis MIE PXR up	Possible out AD	0.844	0.667	0.73	0.8	0.73	0.844	0.783	0.516	0.435	0.597	0.755	0.758	0.75	62
Hepatic Steatosis MIE PXR up	Out AD	0.762	0.5	0.64	0.643	0.64	0.762	0.696	0.538	0.41	0.641	0.631	0.641	0.617	39
Carcinogenicity CAESAR	In AD	0.938	0.87	0.909	0.909	0.909	0.938	0.923	0.582	0.545	0.6	0.904	0.909	0.903	55
Carcinogenicity CAESAR	Possible out AD	0.682	0.765	0.789	0.65	0.789	0.682	0.732	0.564	0.385	0.487	0.723	0.718	0.722	39
Carcinogenicity CAESAR	Out AD	0.543	0.312	0.463	0.385	0.463	0.543	0.5	0.522	0.284	0.612	0.428	0.433	0.412	67
Chromosomal aberration CORAL	In AD	1	1	1	1	1	1	1	0.571	0.571	0.571	1	1	1	14
Chromosomal aberration CORAL	Possible out AD	0.667	1	1	0.846	1	0.667	0.8	0.353	0.235	0.235	0.833	0.882	0.816	17
Chromosomal aberration CORAL	Out AD	1	1	1	1	1	1	1	0.5	0.5	0.5	1	1	1	4
Developmental Toxicity CAESAR	In AD	1	0.8	0.958	1	0.958	1	0.979	0.821	0.821	0.857	0.9	0.964	0.894	28
Developmental Toxicity CAESAR	Possible out AD	0.857	0.2	0.6	0.5	0.6	0.857	0.706	0.583	0.5	0.833	0.529	0.583	0.414	12
Developmental Toxicity CAESAR	Out AD	0.909	0.714	0.833	0.833	0.833	0.909	0.87	0.611	0.556	0.667	0.812	0.833	0.806	18
Hepatic Steatosis MIE NRF2	In AD	0.621	0.805	0.529	0.857	0.529	0.621	0.571	0.261	0.162	0.306	0.713	0.757	0.707	111
Hepatic Steatosis MIE NRF2	Possible out AD	0.682	0.63	0.6	0.708	0.6	0.682	0.638	0.449	0.306	0.51	0.656	0.653	0.655	49
Hepatic Steatosis MIE NRF2	Out AD	0.474	0.514	0.333	0.655	0.333	0.474	0.391	0.339	0.161	0.482	0.494	0.5	0.493	56
Hepatic Steatosis MIE PPARg up	In AD	0.792	0.881	0.613	0.947	0.613	0.792	0.691	0.192	0.152	0.248	0.836	0.864	0.835	125
Hepatic Steatosis MIE PPARg up	Possible out AD	0.733	0.581	0.379	0.862	0.379	0.733	0.5	0.259	0.19	0.5	0.657	0.621	0.653	58
Hepatic Steatosis MIE PPARg up	Out AD	0.667	0.548	0.417	0.773	0.417	0.667	0.513	0.326	0.217	0.522	0.608	0.587	0.605	46
Hepatic Steatosis MIE PPARa up	In AD	0.143	0.988	0.333	0.964	0.333	0.143	0.2	0.041	0.006	0.018	0.565	0.953	0.376	171
Hepatic Steatosis MIE PPARa up	Possible out AD	1	0.957	0.6	1	0.6	1	0.75	0.06	0.06	0.1	0.979	0.96	0.978	50
Hepatic Steatosis MIE PPARa up	Out AD	1	0.561	0.182	1	0.182	1	0.308	0.089	0.089	0.489	0.78	0.6	0.749	45

## Sheet: Table S3 Statistics on multicla
Model	AD_info	Classes	Sensitivity	Specificity	Pos Pred Value	Neg Pred Value	Precision	Recall	F1	Prevalence	Detection Rate	Detection Prevalence	Balanced Accuracy	Accuracy	n
Fish MOA EPA	In AD	Reactivity	0.4	1	1	0.976	1	0.4	0.571	0.04	0.016	0.016	0.7	0.968	125
		Narcosis	1	0.946	0.927	1	0.927	1	0.962	0.408	0.408	0.44	0.973
		Neurotoxicity	1	1	1	1	1	1	1	0.128	0.128	0.128	1
		Uncoupler	1	1	1	1	1	1	1	0.04	0.04	0.04	1
		AChE Inhibition	1	1	1	1	1	1	1	0.352	0.352	0.352	1
		nACHr Antagonism	0	1		0.992		0		0.008	0	0	0.5
		Anticoagulation	1	1	1	1	1	1	1	0.024	0.024	0.024	1
	Possible out AD	Reactivity	0.167	1	1	0.815	1	0.167	0.286	0.214	0.036	0.036	0.583	0.643	28
	Possible out AD	Narcosis	0.867	0.385	0.619	0.714	0.619	0.867	0.722	0.536	0.464	0.75	0.626	0.643
	Possible out AD	Neurotoxicity	0.5	0.962	0.5	0.962	0.5	0.5	0.5	0.071	0.036	0.071	0.731	0.643
	Possible out AD	Uncoupler	0	1		0.929		0		0.071	0	0	0.5	0.643
	Possible out AD	AChE Inhibition	1	0.96	0.75	1	0.75	1	0.857	0.107	0.107	0.143	0.98	0.643
	Possible out AD	nACHr Antagonism		1						0	0	0		0.643
	Possible out AD	Anticoagulation		1						0	0	0		0.643
	Out AD	Reactivity	0.5	0.968	0.667	0.938	0.667	0.5	0.571	0.114	0.057	0.086	0.734	0.629	35
	Out AD	Narcosis	0.923	0.591	0.571	0.929	0.571	0.923	0.706	0.371	0.343	0.6	0.757	0.629
	Out AD	Neurotoxicity	0.125	0.963	0.5	0.788	0.5	0.125	0.2	0.229	0.029	0.057	0.544	0.629
	Out AD	Uncoupler	0.667	0.969	0.667	0.969	0.667	0.667	0.667	0.086	0.057	0.086	0.818	0.629
	Out AD	AChE Inhibition	0.833	0.966	0.833	0.966	0.833	0.833	0.833	0.171	0.143	0.171	0.899	0.629
	Out AD	nACHr Antagonism		1						0	0	0		0.629
	Out AD	Anticoagulation	0	1		0.971		0		0.029	0	0	0.5	0.629
Aromatase activity	In AD	Active Antagonist	0.722	1	1	0.991	1	0.722	0.839	0.032	0.023	0.023	0.861	0.984	559
		Active Agonist	0.886	1	1	0.992	1	0.886	0.939	0.063	0.055	0.055	0.943
		No Active	1	0.83	0.983	1	0.983	1	0.991	0.905	0.905	0.921	0.915
	Possible out AD	Active Antagonist	0.143	1	1	0.903	1	0.143	0.25	0.111	0.016	0.016	0.571	0.714	63
	Possible out AD	Active Agonist	0	0.98	0	0.806	0	0		0.19	0	0.016	0.49	0.714	63
	Possible out AD	No Active	1	0.105	0.721	1	0.721	1	0.838	0.698	0.698	0.968	0.553	0.714	63
	Out AD	Active Antagonist	0	1		0.7		0		0.3	0	0	0.5	0.367	30
	Out AD	Active Agonist	0.1	0.95	0.5	0.679	0.5	0.1	0.167	0.333	0.033	0.067	0.525	0.367	30
	Out AD	No Active	0.909	0.053	0.357	0.5	0.357	0.909	0.513	0.367	0.333	0.933	0.481	0.367	30

## Sheet: Legend
General
If the model name includes 'EXT', the evaluation and calculation of statistics are based on an external dataset. Otherwise, the model parameters should be referred to the test set of the model.
Regression Model Parameters		REGRESSION PARAMETERS DETAILS
RMSE		RMSE (Root-Mean-Square Error):
MAE		- n is the total number of observations
R2		- yi is the actual value of the dependent variable for the ith observation
CCC		- ŷi is the predicted value of the dependent variable for the ith observation
n	number of compounds	MAE (Mean Absolute Error):
		- n is the total number of observations
		- yi is the actual value of the dependent variable for the ith observation
		- ŷi is the predicted value of the dependent variable for the ith observation
		R2:
		- SSres is the sum of squares of the residuals, which is the difference between the actual and predicted values of the dependent variable
		- SStot is the total sum of squares, which is the difference between the actual values of the dependent variable and its mean
		CCC (Lin's concordance correlation coefficient):
		- ρ is the Pearson correlation coefficient between the two sets of measurements
		- σ1 and σ2 are the standard deviations of the two sets of measurements
		- μ1 and μ2 are the means of the two sets of measurements
Classification Model Parameters		CLASSIFICATION PARAMETERS DETAILS
Sensitivity	TP/(TP+FN)			References
Specificity	TN/(FP+TN)	Predicted		Class 1	Class 2
Pos Pred Value	(sensitivity * prevalence)/((sensitivity*prevalence) + ((1-specificity)*(1-prevalence)))		Class 1	TP	FP
Neg Pred Value	(specificity * (1-prevalence))/(((1-sensitivity)*prevalence) + ((specificity)*(1-prevalence)))		Class 2	FN	TN
Precision	TP/(TP+FP)
Recall	TP/(TP+FN)
F1	F1 = 2*precision*recall/(precision+recall)
Prevalence	(TP+FN)/(TP+FP+FN+TN)
Detection Rate	TP/(TP+FP+FN+TN)
Detection Prevalence	(TP+FP)/(TP+FP+FN+TN)
Balanced Accuracy	(sensitivity+specificity)/2
Accuracy	(TP + TN)/(Positive + Negative)
Gmean	sqrt(Sensitivity * Specificity)
n	number of compounds
